# Supplementary material for: CDK6 Antagonizes p53-Induced Responses during Tumorigenesis
Source: Oxford University Press journal article supplement (doi:10.1158/2159-8290.cd-17-0912), 2018-06-13
Supplement: 21598290cd170912-sup-187691_2_supp_4739726_p8d9d2.xlsx [file 21598290cd170912-sup-187691_2_supp_4739726_p8d9d2.xlsx]

## Sheet: Tabelle1
Table S1: Gene onthology analysis from deregulated transcripts in BCR-ABL+ colonies
GO biological process complete	# REFLIST	# Observed	Expected	Fold Enrichment	p-value
execution phase of apoptosis	34	23	6.23	3.69	0.00144
single-organism cellular process	10437	2222	1910.94	1.16	9.42e-19
single-organism process	11808	2514	2161.96	1.16	6.08e-25
cellular process	13385	2988	2450.7	1.22	1.35e-65
apoptotic process	772	255	141.35	1.8	8.57e-15
programmed cell death	802	261	146.84	1.78	1.98e-14
cell death	844	272	154.53	1.76	1.23e-14
DNA damage response, signal transduction by p53 class mediator	29	19	5.31	3.58	0.0252
signal transduction in response to DNA damage	44	27	8.06	3.35	0.000891
intracellular signal transduction	1209	368	221.36	1.66	6.75e-17
response to stimulus	7261	1470	1329.44	1.11	0.0137
regulation of cellular process	9927	2171	1817.56	1.19	7.13e-25
biological regulation	10948	2370	2004.5	1.18	1.05e-26
regulation of biological process	10441	2266	1911.67	1.19	6.22e-25
cellular response to DNA damage stimulus	586	217	107.29	2.02	1.67e-17
cellular response to stress	1282	414	234.73	1.76	3.43e-24
response to stress	2677	716	490.14	1.46	4.43e-21
signal transduction by p53 class mediator	76	41	13.92	2.95	2.2e-05
mitotic DNA integrity checkpoint	52	27	9.52	2.84	0.0203
mitotic cell cycle	555	202	101.62	1.99	2.57e-15
cell cycle	1043	335	190.97	1.75	1.6e-18
DNA integrity checkpoint	93	41	17.03	2.41	0.00439
cell cycle checkpoint	140	57	25.63	2.22	0.000449
cell cycle process	806	259	147.57	1.76	1.19e-13
mitotic cell cycle checkpoint	96	41	17.58	2.33	0.00955
mitotic cell cycle process	532	190	97.41	1.95	1.88e-13
negative regulation of mitotic cell cycle	160	58	29.29	1.98	0.0132
negative regulation of cell cycle	319	109	58.41	1.87	1.25e-05
negative regulation of cellular process	3969	1026	726.7	1.41	6.71e-28
negative regulation of biological process	4288	1100	785.1	1.4	2.49e-29
regulation of cell cycle	770	246	140.98	1.74	1.52e-12
regulation of mitotic cell cycle	383	120	70.12	1.71	0.000225
intrinsic apoptotic signaling pathway in response to DNA damage	77	39	14.1	2.77	0.00027
intrinsic apoptotic signaling pathway	152	67	27.83	2.41	1.49e-06
apoptotic signaling pathway	272	102	49.8	2.05	3.45e-07
intrinsic apoptotic signaling pathway by p53 class mediator	56	28	10.25	2.73	0.0269
DNA-dependent DNA replication	85	42	15.56	2.7	0.000162
DNA replication	161	74	29.48	2.51	2.65e-08
cellular macromolecule biosynthetic process	2696	743	493.62	1.51	1.05e-25
macromolecule biosynthetic process	2724	748	498.75	1.5	1.8e-25
macromolecule metabolic process	5934	1601	1086.47	1.47	7.78e-65
organic substance metabolic process	7499	1927	1373.01	1.4	7.21e-68
metabolic process	7911	2016	1448.45	1.39	5.2e-70
organic substance biosynthetic process	3488	923	638.63	1.45	1.34e-27
biosynthetic process	3566	936	652.91	1.43	6.71e-27
cellular biosynthetic process	3403	900	623.07	1.44	1.26e-26
cellular metabolic process	6931	1831	1269.02	1.44	5.46e-72
cellular macromolecule metabolic process	5328	1482	975.52	1.52	1.6e-66
DNA metabolic process	607	216	111.14	1.94	1.72e-15
nucleic acid metabolic process	3033	849	555.32	1.53	1.09e-32
nucleobase-containing compound metabolic process	3468	967	634.97	1.52	6.82e-38
organic cyclic compound metabolic process	3804	1021	696.49	1.47	6.75e-34
cellular nitrogen compound metabolic process	4034	1098	738.6	1.49	5.78e-40
nitrogen compound metabolic process	4377	1172	801.4	1.46	2.99e-40
heterocycle metabolic process	3570	988	653.64	1.51	1.21e-37
cellular aromatic compound metabolic process	3630	997	664.63	1.5	9.23e-37
primary metabolic process	7066	1834	1293.73	1.42	5.32e-66
regulation of histone methylation	59	29	10.8	2.68	0.0251
regulation of protein modification process	1543	424	282.51	1.5	1.49e-12
regulation of cellular protein metabolic process	2133	578	390.54	1.48	3.08e-17
regulation of protein metabolic process	2313	632	423.49	1.49	3.99e-20
regulation of primary metabolic process	5060	1310	926.45	1.41	2.41e-39
regulation of metabolic process	5412	1403	990.9	1.42	1.06e-43
regulation of macromolecule metabolic process	5063	1332	927	1.44	6.84e-44
regulation of cellular metabolic process	5101	1324	933.96	1.42	1.67e-40
regulation of chromatin organization	150	54	27.46	1.97	0.0356
regulation of chromosome organization	273	94	49.98	1.88	0.000113
regulation of organelle organization	1061	323	194.26	1.66	1.92e-14
regulation of cellular component organization	2248	604	411.59	1.47	2.05e-17
