# Supplementary material for: CDK6 Antagonizes p53-Induced Responses during Tumorigenesis
Source: Oxford University Press journal article supplement (doi:10.1158/2159-8290.cd-17-0912), 2018-06-13
Supplement: 21598290cd170912-sup-187691_2_supp_4739727_p8d9d2.xlsx [file 21598290cd170912-sup-187691_2_supp_4739727_p8d9d2.xlsx]

## Sheet: Tabelle1
Table S2: Gene onthology analysis from deregulated transcripts in BCR-ABL+ cell lines
GO biological process complete	# REFLIST	# Observed	Expected	Fold Enrichment	p-value
regulation of alpha-beta T cell activation (GO:0046634)	84	21	6.19	3.39	0.0185
single organism cell adhesion (GO:0098602)	249	48	18.34	2.62	3.97e-05
positive regulation of supramolecular fiber organization (GO:1902905)	158	30	11.64	2.58	0.0383
positive regulation of cytoskeleton organization (GO:0051495)	183	34	13.48	2.52	0.0146
single organismal cell-cell adhesion (GO:0016337)	221	41	16.28	2.52	0.00138
regulation of actin cytoskeleton organization (GO:0032956)	292	54	21.51	2.51	1.81e-05
regulation of actin filament-based process (GO:0032970)	336	60	24.75	2.42	8.54e-06
positive regulation of cell-cell adhesion (GO:0022409)	213	38	15.69	2.42	0.00963
wound healing (GO:0042060)	265	47	19.52	2.41	0.000652
response to wounding (GO:0009611)	322	56	23.72	2.36	7.46e-05
negative regulation of cell adhesion (GO:0007162)	247	42	18.2	2.31	0.00904
glycoprotein biosynthetic process (GO:0009101)	224	38	16.5	2.3	0.0303
regulation of supramolecular fiber organization (GO:1902903)	298	50	21.95	2.28	0.00132
regulation of cell morphogenesis involved in differentiation (GO:0010769)	293	49	21.59	2.27	0.00192
regulation of cellular component size (GO:0032535)	341	56	25.12	2.23	0.000488
regulation of cellular response to growth factor stimulus (GO:0090287)	244	40	17.98	2.23	0.0378
regulation of cytoskeleton organization (GO:0051493)	448	73	33	2.21	6.85e-06
regulation of GTPase activity (GO:0043087)	284	46	20.92	2.2	0.0104
axon development (GO:0061564)	328	53	24.16	2.19	0.00179
regulation of cell morphogenesis (GO:0022604)	459	74	33.81	2.19	8.21e-06
taxis (GO:0042330)	423	68	31.16	2.18	4.37e-05
axonogenesis (GO:0007409)	307	49	22.62	2.17	0.00711
chemotaxis (GO:0006935)	421	67	31.01	2.16	8.26e-05
regulation of leukocyte cell-cell adhesion (GO:1903037)	291	46	21.44	2.15	0.0195
cell-cell adhesion (GO:0098609)	346	54	25.49	2.12	0.00393
protein phosphorylation (GO:0006468)	747	115	55.03	2.09	3.24e-09
response to inorganic substance (GO:0010035)	345	53	25.42	2.09	0.00791
cell projection morphogenesis (GO:0048858)	429	65	31.6	2.06	0.000788
regulation of cell-cell adhesion (GO:0022407)	378	57	27.85	2.05	0.00553
neuron projection morphogenesis (GO:0048812)	419	63	30.87	2.04	0.0016
cell morphogenesis involved in neuron differentiation (GO:0048667)	380	57	27.99	2.04	0.00649
epithelial tube morphogenesis (GO:0060562)	347	52	25.56	2.03	0.02
tube morphogenesis (GO:0035239)	388	58	28.58	2.03	0.0058
cell migration (GO:0016477)	744	111	54.81	2.03	5.53e-08
positive regulation of cell adhesion (GO:0045785)	370	55	27.26	2.02	0.0131
plasma membrane bounded cell projection morphogenesis (GO:0120039)	424	63	31.24	2.02	0.00238
cell morphogenesis involved in differentiation (GO:0000904)	497	73	36.61	1.99	0.00043
locomotion (GO:0040011)	1042	153	76.76	1.99	1.56e-11
intracellular signal transduction (GO:0035556)	1268	186	93.41	1.99	1.09e-14
cellular response to organonitrogen compound (GO:0071417)	349	51	25.71	1.98	0.049
regulation of anatomical structure size (GO:0090066)	501	73	36.91	1.98	0.000583
cell part morphogenesis (GO:0032990)	453	66	33.37	1.98	0.00246
gland development (GO:0048732)	392	57	28.88	1.97	0.0165
regulation of cell adhesion (GO:0030155)	640	93	47.15	1.97	1.07e-05
cellular response to oxygen-containing compound (GO:1901701)	702	101	51.72	1.95	3.44e-06
regulation of cell migration (GO:0030334)	737	106	54.29	1.95	1.28e-06
regulation of cell motility (GO:2000145)	775	111	57.09	1.94	5.88e-07
localization of cell (GO:0051674)	846	121	62.32	1.94	8.57e-08
cell motility (GO:0048870)	846	121	62.32	1.94	8.57e-08
regulation of neuron projection development (GO:0010975)	515	73	37.94	1.92	0.00163
regulation of locomotion (GO:0040012)	851	120	62.69	1.91	2.49e-07
leukocyte activation (GO:0045321)	465	65	34.26	1.9	0.0119
cell morphogenesis (GO:0000902)	638	89	47	1.89	0.000154
morphogenesis of an epithelium (GO:0002009)	481	67	35.43	1.89	0.00925
embryonic morphogenesis (GO:0048598)	596	83	43.91	1.89	0.0005
cell activation (GO:0001775)	561	78	41.33	1.89	0.00133
tissue morphogenesis (GO:0048729)	583	81	42.95	1.89	0.000793
regulation of anatomical structure morphogenesis (GO:0022603)	944	131	69.54	1.88	8.4e-08
regulation of cellular component movement (GO:0051270)	853	118	62.84	1.88	1.14e-06
phosphorylation (GO:0016310)	977	135	71.97	1.88	5.3e-08
response to oxygen-containing compound (GO:1901700)	1108	153	81.63	1.87	1.94e-09
enzyme linked receptor protein signaling pathway (GO:0007167)	530	73	39.04	1.87	0.00464
movement of cell or subcellular component (GO:0006928)	1206	165	88.84	1.86	4.32e-10
regulation of plasma membrane bounded cell projection organization (GO:0120035)	661	89	48.7	1.83	0.000719
biological adhesion (GO:0022610)	766	103	56.43	1.83	7.31e-05
neuron projection development (GO:0031175)	620	83	45.67	1.82	0.00246
response to hormone (GO:0009725)	516	69	38.01	1.82	0.0253
detection of chemical stimulus involved in sensory perception (GO:0050907)	305	4	22.47	< 0.2	0.017
sensory perception of chemical stimulus (GO:0007606)	1393	10	102.62	< 0.2	5.83e-29
sensory perception of smell (GO:0007608)	1106	5	81.48	< 0.2	1.75e-25
