# Supplementary material for: CDK6 Antagonizes p53-Induced Responses during Tumorigenesis
Source: Oxford University Press journal article supplement (doi:10.1158/2159-8290.cd-17-0912), 2018-06-13
Supplement: 21598290cd170912-sup-187691_2_supp_4739728_p8d9d2.xlsx [file 21598290cd170912-sup-187691_2_supp_4739728_p8d9d2.xlsx]

## Sheet: Tabelle1
Table S3:Gene onthology analysis from CDK6-bound and deregulated transcripts in BCR-ABL+ colonies
GO biological process complete	# REFLIST	# Observed	Expected	Fold Enrichment	p-value
execution phase of apoptosis (GO:0097194)	38	18	3.52	5.12	0.000312
signal transduction in response to DNA damage (GO:0042770)	46	17	4.26	3.99	0.0211
hydrogen ion transmembrane transport (GO:1902600)	49	17	4.54	3.75	0.0477
positive regulation of mitotic cell cycle phase transition (GO:1901992)	61	21	5.65	3.72	0.00455
DNA-dependent DNA replication (GO:0006261)	94	30	8.7	3.45	0.000102
regulation of sister chromatid segregation (GO:0033045)	70	22	6.48	3.4	0.0108
spindle assembly (GO:0051225)	69	21	6.39	3.29	0.0303
regulation of cyclin-dependent protein serine/threonine kinase activity (GO:0000079)	71	21	6.57	3.2	0.0465
regulation of chromosome segregation (GO:0051983)	88	26	8.15	3.19	0.00389
regulation of G1/S transition of mitotic cell cycle (GO:2000045)	103	30	9.53	3.15	0.000719
DNA replication (GO:0006260)	163	47	15.09	3.11	2.6e-07
signal transduction by p53 class mediator (GO:0072331)	80	23	7.41	3.11	0.027
mRNA splicing via spliceosome (GO:0000398)	165	47	15.27	3.08	3.86e-07
RNA splicing via transesterification reactions with bulged adenosine as nucleophile (GO:0000377)	165	47	15.27	3.08	3.86e-07
RNA splicing via transesterification reactions (GO:0000375)	166	47	15.37	3.06	4.7e-07
DNA integrity checkpoint (GO:0031570)	97	27	8.98	3.01	0.00725
negative regulation of cell cycle phase transition (GO:1901988)	120	33	11.11	2.97	0.000618
negative regulation of mitotic cell cycle phase transition (GO:1901991)	113	31	10.46	2.96	0.00159
positive regulation of chromosome organization (GO:2001252)	161	44	14.9	2.95	5.49e-06
negative regulation of chromosome organization (GO:2001251)	110	30	10.18	2.95	0.0028
regulation of mitotic cell cycle phase transition (GO:1901990)	235	64	21.75	2.94	9.24e-10
regulation of cell cycle G1/S phase transition (GO:1902806)	114	31	10.55	2.94	0.00192
RNA splicing (GO:0008380)	306	81	28.33	2.86	2.38e-12
ATP metabolic process (GO:0046034)	159	42	14.72	2.85	3.47e-05
regulation of cell cycle phase transition (GO:1901987)	256	67	23.7	2.83	1.46e-09
regulation of DNA biosynthetic process (GO:2000278)	107	28	9.9	2.83	0.0148
mRNA processing (GO:0006397)	380	99	35.18	2.81	3.23e-15
negative regulation of cell cycle process (GO:0010948)	182	47	16.85	2.79	8.63e-06
cell cycle checkpoint (GO:0000075)	148	38	13.7	2.77	0.000379
mitotic cell cycle checkpoint (GO:0007093)	106	27	9.81	2.75	0.0364
spindle organization (GO:0007051)	119	30	11.02	2.72	0.0135
cellular respiration (GO:0045333)	132	33	12.22	2.7	0.00501
regulation of chromatin organization (GO:1902275)	163	40	15.09	2.65	0.000551
regulation of chromosome organization (GO:0033044)	307	75	28.42	2.64	1.52e-09
purine ribonucleoside monophosphate metabolic process (GO:0009167)	185	45	17.13	2.63	0.000111
DNA conformation change (GO:0071103)	165	40	15.27	2.62	0.000752
mitotic cell cycle (GO:0000278)	442	107	40.92	2.62	1.89e-14
purine nucleoside monophosphate metabolic process (GO:0009126)	186	45	17.22	2.61	0.000129
positive regulation of cellular amide metabolic process (GO:0034250)	120	29	11.11	2.61	0.0441
protein polyubiquitination (GO:0000209)	170	41	15.74	2.61	0.000598
nucleoside monophosphate metabolic process (GO:0009123)	196	47	18.14	2.59	8.15e-05
ribonucleoside monophosphate metabolic process (GO:0009161)	188	45	17.4	2.59	0.000175
ribonucleoside triphosphate metabolic process (GO:0009199)	189	45	17.5	2.57	0.000204
purine ribonucleoside triphosphate metabolic process (GO:0009205)	185	44	17.13	2.57	0.000299
mitotic cell cycle process (GO:1903047)	388	92	35.92	2.56	1.56e-11
positive regulation of cell cycle process (GO:0090068)	220	52	20.37	2.55	2.19e-05
mRNA metabolic process (GO:0016071)	492	116	45.54	2.55	4.68e-15
protein modification by small protein conjugation (GO:0032446)	461	108	42.67	2.53	1.21e-13
purine nucleoside triphosphate metabolic process (GO:0009144)	193	45	17.87	2.52	0.000367
proteasomal protein catabolic process (GO:0010498)	264	61	24.44	2.5	2.26e-06
nucleoside triphosphate metabolic process (GO:0009141)	209	48	19.35	2.48	0.000208
cellular response to DNA damage stimulus (GO:0006974)	620	142	57.39	2.47	5.85e-18
Golgi vesicle transport (GO:0048193)	210	48	19.44	2.47	0.000239
positive regulation of mitotic cell cycle (GO:0045931)	140	32	12.96	2.47	0.0454
protein ubiquitination (GO:0016567)	422	96	39.06	2.46	4.46e-11
peptidyl-lysine modification (GO:0018205)	220	50	20.37	2.46	0.000148
proteasome-mediated ubiquitin-dependent protein catabolic process (GO:0043161)	234	53	21.66	2.45	6.26e-05
G-protein coupled receptor signaling pathway (GO:0007186)	1801	29	166.72	< 0.2	9.24e-38
sensory perception (GO:0007600)	1766	26	163.48	< 0.2	6.76e-39
detection of chemical stimulus (GO:0009593)	332	3	30.73	< 0.2	1.68e-06
detection of stimulus involved in sensory perception (GO:0050906)	374	3	34.62	< 0.2	4.61e-08
humoral immune response mediated by circulating immunoglobulin (GO:0002455)	161	1	14.9	< 0.2	0.0433
sensory perception of chemical stimulus (GO:0007606)	1393	1	128.95	< 0.2	1.72e-52
