# Supplementary material for: CDK6 Antagonizes p53-Induced Responses during Tumorigenesis
Source: Oxford University Press journal article supplement (doi:10.1158/2159-8290.cd-17-0912), 2018-06-13
Supplement: 21598290cd170912-sup-187691_2_supp_4739730_p8d9d2.xlsx [file 21598290cd170912-sup-187691_2_supp_4739730_p8d9d2.xlsx]

## Sheet: Tabelle1
Table S5: Gene onthology analysis from CDK6-bound and deregulated transcripts in BCR-ABL+ colonies and cell lines (Intersect)
GO biological process complete	# REFLIST	# Observed	Expected	Fold Enrichment	p-value
intracellular signal transduction (GO:0035556)	1268	41	14.44	2.84	1.58e-05
regulation of cell cycle (GO:0051726)	904	29	10.29	2.82	0.00552
response to abiotic stimulus (GO:0009628)	853	27	9.71	2.78	0.0177
cellular protein modification process (GO:0006464)	2198	51	25.03	2.04	0.00636
protein modification process (GO:0036211)	2198	51	25.03	2.04	0.00636
macromolecule modification (GO:0043412)	2436	54	27.74	1.95	0.0113
cellular protein metabolic process (GO:0044267)	2716	58	30.92	1.88	0.0136
primary metabolic process (GO:0044238)	7344	131	83.62	1.57	5.4e-06
cellular metabolic process (GO:0044237)	7121	127	81.08	1.57	1.4e-05
organic substance metabolic process (GO:0071704)	7701	137	87.68	1.56	1.5e-06
cellular macromolecule metabolic process (GO:0044260)	5406	95	61.55	1.54	0.017
metabolic process (GO:0008152)	8167	140	92.99	1.51	1.23e-05
macromolecule metabolic process (GO:0043170)	6121	103	69.69	1.48	0.0364
single-organism cellular process (GO:0044763)	8674	145	98.76	1.47	2.74e-05
nitrogen compound metabolic process (GO:0006807)	6795	112	77.37	1.45	0.0265
single-organism process (GO:0044699)	12194	182	138.84	1.31	0.000156
cellular process (GO:0009987)	13743	201	156.47	1.28	1.15e-05
Unclassified (UNCLASSIFIED)	1680	7	19.13	0.37	0
sensory perception of chemical stimulus (GO:0007606)	1393	1	15.86	< 0.2	0.0117
