# Supplementary material for: CDK6 Antagonizes p53-Induced Responses during Tumorigenesis
Source: Oxford University Press journal article supplement (doi:10.1158/2159-8290.cd-17-0912), 2018-06-13
Supplement: 21598290cd170912-sup-187691_2_supp_4739731_p8d9d2.xlsx [file 21598290cd170912-sup-187691_2_supp_4739731_p8d9d2.xlsx]

## Sheet: Tabelle1
Table S6: Statistics on the geneset enrichment analysis performed on CDK6-correlated transcripts
Dataset	bcrablpos
Phenotype	NoPhenotypeAvailable
Upregulated in class	na_pos
GeneSet	E2F1_Q4.grp
Enrichment Score (ES)	0.364468
Normalized Enrichment Score (NES)	1.60143
Nominal p-value	0
FDR q-value	0
FWER p-Value	0
Dataset	MDS
Phenotype	NoPhenotypeAvailable
Upregulated in class	na_pos
GeneSet	E2F1_Q4.grp
Enrichment Score (ES)	0.300332
Normalized Enrichment Score (NES)	1.7075
Nominal p-value	0
FDR q-value	0
FWER p-Value	0
Dataset	bcrablneg
Phenotype	NoPhenotypeAvailable
Upregulated in class	na_pos
GeneSet	E2F1_Q4.grp
Enrichment Score (ES)	0.258299
Normalized Enrichment Score (NES)	1.46803
Nominal p-value	0.00209205
FDR q-value	0.00209205
FWER p-Value	0.001
Dataset	target
Phenotype	NoPhenotypeAvailable
Upregulated in class	na_pos
GeneSet	E2F1_Q4.grp
Enrichment Score (ES)	0.329253
Normalized Enrichment Score (NES)	1.73644
Nominal p-value	0
FDR q-value	0
FWER p-Value	0
Dataset	bcrablpos
Phenotype	NoPhenotypeAvailable
Upregulated in class	na_pos
GeneSet	GATTGGY_NFY_Q6_01.grp
Enrichment Score (ES)	0.491038
Normalized Enrichment Score (NES)	1.80321
Nominal p-value	0.00132979
FDR q-value	0.001
FWER p-Value	0.001
Dataset	MDS
Phenotype	NoPhenotypeAvailable
Upregulated in class	na_pos
GeneSet	GATTGGY_NFY_Q6_01.grp
Enrichment Score (ES)	0.478536
Normalized Enrichment Score (NES)	2.05305
Nominal p-value	0
FDR q-value	0
FWER p-Value	0
Dataset	bcrablneg
Phenotype	NoPhenotypeAvailable
Upregulated in class	na_pos
GeneSet	GATTGGY_NFY_Q6_01.grp
Enrichment Score (ES)	0.438196
Normalized Enrichment Score (NES)	1.91838
Nominal p-value	0.00214592
FDR q-value	0.00128205
FWER p-Value	0.001
Dataset	targetranked
Phenotype	NoPhenotypeAvailable
Upregulated in class	na_pos
GeneSet	GATTGGY_NFY_Q6_01.grp
Enrichment Score (ES)	0.616259
Normalized Enrichment Score (NES)	2.53811
Nominal p-value	0
FDR q-value	0
FWER p-Value	0
Dataset	bcrablpos
Phenotype	NoPhenotypeAvailable
Upregulated in class	na_pos
GeneSet	genesetp53regulationpathway.grp
Enrichment Score (ES)	0.350324
Normalized Enrichment Score (NES)	1.29942
Nominal p-value	0.104439
FDR q-value	0.1254
FWER p-Value	0.303
Dataset	MDS
Phenotype	NoPhenotypeAvailable
Upregulated in class	na_pos
GeneSet	genesetp53regulationpathway.grp
Enrichment Score (ES)	0.490803
Normalized Enrichment Score (NES)	2.16749
Nominal p-value	0
FDR q-value	0
FWER p-Value	0
Dataset	bcrablneg
Phenotype	NoPhenotypeAvailable
Upregulated in class	na_pos
GeneSet	genesetp53regulationpathway.grp
Enrichment Score (ES)	0.393354
Normalized Enrichment Score (NES)	1.76017
Nominal p-value	0
FDR q-value	0.000641026
FWER p-Value	0.001
Dataset	targetranked
Phenotype	NoPhenotypeAvailable
Upregulated in class	na_pos
GeneSet	genesetp53regulationpathway.grp
Enrichment Score (ES)	0.466399
Normalized Enrichment Score (NES)	1.9339
Nominal p-value	0.00165837
FDR q-value	0.000600601
FWER p-Value	0.001
